# Supplementary material for: Ventral pallidal regulation of motivated behaviors and reinforcement
Source: Front Neural Circuits. 2023 Feb 2;17:1086053. doi: 10.3389/fncir.2023.1086053 (PMC9932340; doi:10.3389/fncir.2023.1086053)
Supplement: Supplementary file 1 [file Table_1.XLSX]

## Sheet: Tables
	Table 1: Reinforcement, pleasure, reward and aversion (brain stimulation and food)
	Behavior	Cell/circuit	Manipulation	Effect	Summary	Citation
	ICSS	VPGABA	Optogenetic excitation (ChR2)	↑ Responding	Positive reinforcement	Faget, 2018; Stephenson-Jones, 2020
	ICSS	VPGlu	Optogenetic excitation (ChR2)	↔ Responding	No effect	Faget, 2018
	ICSS	VP-NAshell	Optogenetic excitation (ChR2)	↔ Responding	No effect	Vachez, 2022
	ICSS	NAcD1-VP	Optogenetic excitation (ChR2)	↓ Responding	Negative reinforcement	Liu, 2022
	ICSS	VTAGlu-VP	Optogenetic excitation (ChR2)	↑ Responding	Positive reinforcement	Yoo, 2016
	RTPP	VP	Optogenetic excitation (ChR2)	↑ Preference	Positive reinforcement	Tooley, 2018
	RTPP	VPGABA	Optogenetic excitation (ChR2)	↑ Preference	Positive reinforcement	Zhu, 2017; Faget, 2018; Stephenson-Jones, 2020; Yao, 2021
	RTPP	VPGABA-VTA	Optogenetic excitation (ChR2)	↑ Preference	Positive reinforcement	Faget, 2018
	RTPP	VPGABA-PAG	Optogenetic excitation (ChR2)	↑ Preference	Positive reinforcement	Roman-Ortiz, 2021
	RTPP	VPGABA-lHb	Optogenetic excitation (ChR2)	↔ Preference	No effect	Faget, 2018
	RTPP	VPDrd3-VTA	Optogenetic excitation (ChR2)	↑ Preference	Positive reinforcement	Pribiag, 2021
	RTPP	VPDrd3-lHb	Optogenetic excitation (ChR2)	↑ Preference	Positive reinforcement	Pribiag, 2021
	RTPP	VPGlu	Optogenetic excitation (ChR2)	↓ Preference	Negative reinforcement	Tooley, 2018; Faget, 2018; Stephenson-Jones, 2020; Liu, 2020; McKenna, 2021; Yao, 2021
	RTPP	dmNAshellD2-VP	Optogenetic excitation (ChR2)	↑ Preference	Positive reinforcement	Yao, 2021
	RTPP	vNAshellD2-VP	Optogenetic excitation (ChR2)	↓ Preference	Negative reinforcement	Yao, 2021
	RTPP	NAcD1-VP	Optogenetic excitation (ChR2)	↓ Preference	Negative reinforcement	Liu, 2022
	RTPP	VPGABA	Optogenetic inhibition (eNpHR3.0; GtACR2)	↓ Preference	Negative reinforcement	Faget, 2018; Yao, 2021
	RTPP	VPGABA	Optogenetic inhibition (ArchT)	↔ Preference	No effect	Stephenson-Jones, 2020
	RTPP	VPGlu	Optogenetic inhibition (ArchT; eNpHR3.0)	↔ Preference	No effect	Faget, 2018; Stephenson-Jones, 2020
	RTPP	VPGlu	Optogenetic inhibition (GtACR2)	↑ Preference	Positive reinforcement	Yao, 2021
	RTPP	VPGlu-VTA	Optogenetic excitation (ChR2)	↓ Preference	Negative reinforcement	Faget, 2018
	RTPP	VPGlu-lHb	Optogenetic excitation (ChR2)	↓ Preference	Negative reinforcement	Faget, 2018
	RTPP	VP-NAshell	Optogenetic inhibition (Arch3.0)	↔ Preference	No effect	Vachez, 2022
	RTPP	VTAGlu-VP	Optogenetic excitation (ChR2)	↓ Preference	Negative reinforcement	Yoo, 2016
	CPP	VPGABA	Optogenetic excitation (ChR2)	↑ Preference	Produces conditioned approach	Faget, 2018
	CPP	VPGABA	Optogenetic excitation (ChR2)	↔ Preference	No effect	Roman-Ortiz, 2021
	CPP	VPGABA-PAG	Optogenetic excitation (ChR2)	↑ Preference	Produces conditioned approach	Roman-Ortiz, 2021
	CPP	NAcD1-VP	Optogenetic excitation (ChR2)	↓ Preference	Produces conditioned avoidance	Liu, 2022
	CPP	NAcD2-VP	Brief Optogenetic excitation (ChR2)	↑ Preference	Produces conditioned approach	Soares-Cunha, 2020
	CPP	NAcD2-VP	Prolonged Optogenetic excitation (ChR2)	↓ Preference	Produces conditioned avoidance	Soares-Cunha, 2020
	CPP	NAcD1-VP	Optogenetic inhibition (eNpHR3.0)	↑ Preference	Produces conditioned approach	Liu, 2022
	Shuttle Box	VPGlu	Optogenetic inhibition (eNpHR3.0)	↓ Shock avoidance	Reduces conditioned avoidance	Wang, 2020
	Choice task	VP	Optogenetic excitation (ChR2) during reward	↑ Preference non-preferred reward	Promotes positive reinforcement	Ottenheimer, 2020
	Cued choice task	VPGABA	Optogenetic excitation (ChR2) during choice	↑ Choice for small rewards	Promotes conditioned consumption	Stephenson-Jones, 2020
	Cued choice task	VPGlu	Optogenetic excitation (ChR2) during choice	↓ Choice for small rewards	Reduces conditioned consumption	Stephenson-Jones, 2020
	Cued choice task	VPGABA	Optogenetic inhibition (ArchT) during choice	↓ Choice for large rewards	Reduces positive reinforcement	Stephenson-Jones, 2020
	Cued choice task	VPGABA-lHb	Optogenetic inhibition (ArchT) during choice	↓ Choice for large rewards	Reduces positive reinforcement	Stephenson-Jones, 2020
	Cued choice task	VPGlu	Optogenetic inhibition (ArchT) during choice	↔ Choice	No effect	Stephenson-Jones, 2020
	Cued choice task	VPGlu-lHb	Optogenetic inhibition (ArchT) during choice	↔ Choice	No effect	Stephenson-Jones, 2020
	Risky choice task	VPGABA	Chemogenetic inihbition (hM4Di)	↓ Choice for punished large regards	Promotes punishment aversion	Farrell, 2021
	Cued conflict task	VPGABA	Optogenetic inhibition (ArchT) during choice	↓ Choice for punished large rewards	Promotes punishment aversion	Stephenson-Jones, 2020
	Cued conflict task	VPGlu	Optogenetic inhibition (ArchT) during choice	↑ Choice for punished large rewards	Reduces punishment aversion	Stephenson-Jones, 2020
	Cued conflict task	VPGABA-lHb	Optogenetic inhibition (ArchT) during choice	↔ Choice of punished rewards	No effect	Stephenson-Jones, 2020
	Cued conflict task	VPGlu-lHb	Optogenetic inhibition (ArchT) during choice	↑ Choice of punished rewards	Reduces punishment aversion	Stephenson-Jones, 2020
	Cued reward task	VP	Optogenetic excitation (ChR2) during reward	↓ Distance from reward port	Promotes positive reinforcement	Ottenheimer, 2020
	Cued reward task	VPGABA	Optogenetic excitation (ChR2) during cue+reward	↑ Responding	Promotes positive reinforcement	Stephenson-Jones, 2020
	Cued reward task	VPGlu	Optogenetic excitation (ChR2) during cue+reward	↓ Responding	Reduces positive reinforcement	Stephenson-Jones, 2020
	Cued reward task	VTAGABA-VP	Chemogenetic actvation (hM3Dq)	↑ Responding	Promotes positive reinforcement	Zhou, 2022
	Cued reward task	VP	Optogenetic inhibition (Arch3.0) during cue	↑ Latency, ↑ Omissions	Reduces positive reinforcement	Richard, 2016
	Cued reward task	VP	Optogenetic inhibition (Arch3.0) during reward	↑ Distance from reward port	Reduces positive reinforcement	Ottenheimer, 2020
	Cued reward task	VPGABA	Optogenetic inhibition (ArchT) during cue+reward	↓ Responding	Reduces positive reinforcement	Stephenson-Jones, 2020
	Cued reward task	VPGABA-lHb	Optogenetic inhibition (ArchT) during cue+reward	↓ Responding	Reduces positive reinforcement	Stephenson-Jones, 2020
	Cued reward task	VPGlu	Optogenetic inhibition (ArchT) during cue+reward	↔ Responding	No effect	Stephenson-Jones, 2020
	Cued reward task	VPGlu-lHb	Optogenetic inhibition (ArchT) during cue+reward	↔ Responding	No effect	Stephenson-Jones, 2020
	Punishment task	VPGABA	Optogenetic excitation (ChR2) during cue+punishment	↓ Responding	Reduces negative reinforcement	Stephenson-Jones, 2020
	Punishment task	VPGlu	Optogenetic excitation (ChR2) during cue+punishment	↑ Responding	Promotes negative reinforcement	Stephenson-Jones, 2020
	Punishment task	VPGABA	Optogenetic inhibition (ArchT) during cue+punishment	↔ Responding	No effect	Stephenson-Jones, 2020
	Punishment task	VPGABA-lHb	Optogenetic inhibition (ArchT) during cue+punishment	↓ Responding	Reduces negative reinforcement	Stephenson-Jones, 2020
	Punishment task	VPGlu	Optogenetic inhibition (ArchT) during cue+punishment	↓ Responding	Reduces negative reinforcement	Stephenson-Jones, 2020
	Punishment task	VPGlu-lHb	Optogenetic inhibition (ArchT) during cue+punishment	↓ Responding	Reduces negative reinforcement	Stephenson-Jones, 2020
	Feeding	VPGABA	Optogenetic excitation (ChR2)	↑ Consumption, ↑ Gnawing	Promotes feeding	Roman-Ortiz, 2021; Zhu, 2017
	Feeding	VPGABA	Optogenetic excitation (ChR2)	↑ Hunting	Promotes feeding	Roman-Ortiz, 2021
	Feeding	VPGABA-PAG	Optogenetic excitation (ChR2)	↑ Consumption, ↑ Gnawing, ↑ Hunting	Promotes feeding	Roman-Ortiz, 2021
	Sucrose consumption	VP-NAshell	Optogenetic excitation (ChR2)	↑ Drinking duration, preference for paired bottle	Promotes feeding	Vachez, 2022
	Sucrose consumption	VPGlu	Optogenetic excitation (ChR2)	↓ Consumption	Reduces feeding	Yao, 2021
	Sucrose consumption	VPGABA	Optogenetic inhibition (GtACR2)	↓ Consumption	Reduces feeding	Yao, 2021
	Sucrose consumption	VP-NAshell	Optogenetic inhibition (Arch3.0)	↓ Drinking duration	Reduces feeding	Vachez, 2022
	Sucrose consumption	NAshellD2-VP	Optogenetic excitation (ChR2)	↓ Consumption	Reduces feeding	Yao, 2021
	Sucrose PR	NAshellD2-VP	Optogenetic excitation (ChR2)	↑ Break point	Promotes motivation	Yao, 2021
	Sucrose PR	NAcD2-VP	Optogenetic excitation during cue (ChR2)	↑ Break point	Promotes motivation	Soares-Cunha, 2022
	Sucrose PR	NAcD2-VP	Optogenetic excitation during reward (ChR2)	↓ Break point	Reduces motivation	Soares-Cunha, 2022
	Sucrose PR	VTAGABA-VP	Chemogenetic actvation (hM3Dq)	↑ Break point	Promotes motivation	Zhou, 2022
	Sucrose PR	VPGlu	Genetic ablation (Caspase 3)	↑ Break point	Promotes motivation	Tooley, 2018
	Sucrose PR	NAcD2-VP	Chemogenetic inhibition (hM4Di)	↑ Break point	Promotes motivation	Gallo, 2018
	Sucrose PR	NAcD2-VP	Optogenetic inhibition during cue (eNpHR3.0)	↓ Break point	Reduces motivation	Soares-Cunha, 2022
	Sucrose PR	NAcD2-VP	Optogenetic inhibition during reward (eNpHR3.0)	↑ Break point	Promotes motivation	Soares-Cunha, 2022
	Sign Tracking	VP	Chemogenetic inhibition (hM4Di)	↓ Cue-interaction	Disrupts incentive salience attribution	Chang, 2015
	Sucrose vs. salt preference	VP	Optogenetic inhibition (eNpHR3.0)	↓ Salt consumption and salt CPP following salt deprivation	Disrupts incentive salience attribution	Chang, 2017
	Conditioned taste aversion	VPGABA	Genetic ablation (Caspase 3)	↔ Consumption	No effect	Wulff, 2019
	Conditioned taste aversion	VPGlu	Genetic ablation (Caspase 3)	↑ Consumption	Aversion processing deficit	Tooley, 2018
	Orofacial Taste Reactivity	VP-NAshell	Optogenetic excitation (ChR2)	↑ Sucrose 'liking'	Promotes pleasure	Vachez, 2022
	Novelty processing	VPGlu	Optogenetic inhibition (eNpHR3.0)	↓ Interaction with novel mouse/object	Reduces novelty approach	Wang, 2020
	Table 2: Drug reward and relapse to drug seeking
	Behavior	Cell/circuit	Manipulation	Effect	Summary	Citation
	Cocaine reinstatement	rostral VP	Chemogenetic inhibition (hM4Di)	↓ Responding (cue-induced)	Anti-relapse	Mahler, 2014b
	Cocaine reinstatement	caudal VP	Chemogenetic inhibition (hM4Di)	↓ Responding (cocaine-induced)	Anti-relapse	Mahler, 2014b
	Cocaine reinstatement	VP-NAcore	Optogenetic inhibition (ArchT)	↔ Responding (cue+cocaine-induced)	No effect	Stefanik, 2013
	Cocaine reinstatement (ABA punishment)	VP	Chemogenetic inhibition (hM4Di)	↓ Responding in safe context (cue-, context-, and cocaine-induced)	Anti-relapse	Farrell, 2019
	Cocaine reinstatement	VPGABA	Chemogenetic activation (hM3D)	↔ Responding (cue-induced)	No effect	Heinsbroek, 2020
	Cocaine reinstatement	VPPenk	Chemogenetic activation (hM3D)	↑ Responding (cue-induced)	Pro-relapse	Heinsbroek, 2020
	Cocaine reinstatement	VPGlu	Chemogenetic activation (hM3D)	↓ Responding (cue-induced)	Anti-relapse	Heinsbroek, 2020
	Cocaine reinstatement	NAcore-dlVP	Optogenetic inhibition (ArchT)	↓ Responding (cue+cocaine-induced)	Anti-relapse	Stefanik, 2013
	Cocaine reinstatement	NAcoreD1-dlVP	Chemogenetic inhibition (hM4Di)	↓ Responding (cue-induced)	Anti-relapse	Pardo-Garcia, 2019
	Cocaine reinstatement	NAcoreD1-dlVP	Chemogenetic inhibition (hM4Di)	↔ Responding (cocaine-induced)	No effect	Pardo-Garcia, 2019
	Cocaine reinstatement	NAcD1-VP	Chemogenetic disconnection (rM3Ds/hM4Di)	VP inhibition blocks D1-MSN effect (cue-induced)	Pro-relapse	Heinsbroek, 2017
	Cocainer reinstatement	NAcD2-VP	Chemogenetic disconnection (hM4Di/hM4Di)	VP inhibition blocks D2-MSN effect (cue-induced)	Anti-relapse	Heinsbroek, 2017
	Cocaine seeking (after abstinence)	VPDrd3	Chemogenetic inhibition (hM4Di)	↓ Responding	Anti-relapse	Pribiag, 2021
	Cocaine seeking (after abstinence)	VPDrd3-VTA	Chemogenetic inhibition (hM4Di)	↑ Responding	Pro-relapse	Pribiag, 2021
	Cocaine seeking (after abstinence)	VPDrd3-lHb	Chemogenetic inhibition (hM4Di)	↓ Responding	Anti-relapse	Pribiag, 2021
	Cocaine seeking (after abstinence)	VPDrd3-VTA	Optogenetic inhibition (eNpHR3.0)	↔ Responding	No effect	Pribiag, 2021
	Cocaine seeking (after abstinence)	VPDrd3-lHb	Optogenetic inhibition (eNpHR3.0)	↓ Responding	Anti-relapse	Pribiag, 2021
	Cocaine seeking (after abstinence)	VPDrd3-VTA	Optogenetic excitation (ChR2)	↔ Responding	No effect	Pribiag, 2021
	Cocaine seeking (after abstinence)	VPDrd3-lHb	Optogenetic excitation (ChR2)	↔ Responding	No effect	Pribiag, 2021
	Heroin reinstatement	NAc-VP	Chemogenetic inhibition (hM4Di)	↑ Responding (cue-induced)	Pro-relapse	O'Neal, 2019
	Heroin reinstatement	NAc-VP	Chemogenetic stimulation (hM3Dq)	↓ Responding (cue-induced)	Anti-relapse	O'Neal, 2019
	Remifentanyl reinstatement (ABA punishment)	VPGABA	Chemogenetic inhibition (hM4Di)	↓ Responding in sate context (cue-induced)	Anti-relapse	Farrell, 2022
	Remifentanyl reinstatement (ABA extinction)	VPGABA	Chemogenetic activation (hM3D)	↑ Responding (cue- and context-induced)	Anti-relapse	Farrell, 2022
	Remifentanyl reinstatement (ABA punishment)	VPGABA	Chemogenetic activation (hM3D)	↑ Responding in sate and punished contexts (cue-induced)	Anti-relapse	Farrell, 2022
	Alcohol reinstatement (ABA extinction)	VP	Chemogenetic activation (hM3D)	↑ Responding (context-induced)	Anti-relapse	Prasad and McNally, 2016
	Alcohol reinstatement (ABA extinction)	VP	Chemogenetic inhibition (hM4Di)	↓ Responding (context-induced)	Anti-relapse	Prasad and McNally, 2016
	Alcohol reinstatement (ABA extinction)	VPGABA	Chemogenetic inhibition (hM4Di)	↓ Responding (context-induced)	Anti-relapse	Prasad and McNally, 2019
	Alcohol reinstatement (ABA extinction)	VPPV	Chemogenetic inhibition (hM4Di)	↓ Responding (context-induced)	Anti-relapse	Prasad and McNally, 2019
	Alcohol reinstatement (ABA extinction)	VPGABA-VTA	Chemogenetic disconnection (hM4Di)	↔ Responding (context-induced)	No effect	Prasad and McNally, 2019
	Alcohol reinstatement (ABA extinction)	VPGABA-LH	Chemogenetic disconnection (hM4Di)	↓ Responding (context-induced)	Anti-relapse	Prasad and McNally, 2019
	Alcohol reinstatement (ABA extinction)	VPPV-VTA	Chemogenetic disconnection (hM4Di)	↓ Responding (context-induced)	Anti-relapse	Prasad and McNally, 2019
	Alcohol reinstatement (ABA extinction)	VPPV-LH	Chemogenetic disconnection (hM4Di)	↔ Responding (context-induced)	No effect	Prasad and McNally, 2019
	Alcohol reinstatement (ABA extinction)	VP-STN	Chemogenetic disconnection (hM4Di)	↓ Responding (context-induced)	Anti-relapse	Prasad and McNally, 2016
	Alcohol reinstatement (ABA extinction)	VP-VTA	Chemogenetic disconnection (hM4Di)	↓ Responding (context-induced)	Anti-relapse	Prasad and McNally, 2016
	Cocaine extinction	VPGABA	Chemogenetic activation (hM3D)	↑ Responding	Pro-relapse	Heinsbroek, 2020
	Cocaine extinction	VPPenk	Chemogenetic activation (hM3D)	↑ Responding	Pro-relapse	Heinsbroek, 2020
	Cocaine extinction	VPGlu	Chemogenetic activation (hM3D)	↓ Responding	Anti-relapse	Heinsbroek, 2020
	Alcohol re-acquisition	VP	Chemogenetic inhibition (hM4Di)	↓ Responding	Reduced drug use	Prasad and McNally, 2016
	Alcohol re-acquisition	VPGABA	Chemogenetic inhibition (hM4Di)	↔ Responding	No effect	Prasad and McNally, 2019
	Alcohol re-acquisition	VPGABA-VTA	Chemogenetic disconnection (hM4Di)	↔ Responding	No effect	Prasad and McNally, 2019
	Alcohol re-acquisition	VPGABA-LH	Chemogenetic disconnection (hM4Di)	↔ Responding	No effect	Prasad and McNally, 2019
	Alcohol re-acquisition	VPPV	Chemogenetic inhibition (hM4Di)	↓ Responding	Reduced drug use	Prasad and McNally, 2019
	Alcohol re-acquisition	VPPV-VTA	Chemogenetic disconnection (hM4Di)	↓ Responding	Reduced drug use	Prasad and McNally, 2019
	Alcohol re-acquisition	VPPV-LH	Chemogenetic disconnection (hM4Di)	↔ Responding	No effect	Prasad and McNally, 2019
	Alcohol re-acquisition	VP-VTA	Chemogenetic disconnection (hM4Di)	↓ Responding	Reduced drug use	Prasad and McNally, 2016
	Alcohol re-acquisition	VP-STN	Chemogenetic disconnection (hM4Di)	↓ Responding	Reduced drug use	Prasad and McNally, 2016
	Alcohol re-acquisition	VP	Chemogenetic activation (hM3D)	↑ Responding	Increased drug use	Prasad and McNally, 2016
	Alcohol PR	VP-VTA	Chemogenetic disconnection (hM4Di)	↓ Break point	Reduced drug motivation	Prasad and McNally, 2016
	Alcohol PR	VP-STN	Chemogenetic disconnection (hM4Di)	↓ Break point	Reduced drug motivation	Prasad and McNally, 2016
	Cocaine CPP (after abstinence)	VP-VTA	Chemogenetic inhibition (hM4Di)	↑ Expression	Promotes conditioned drug seeking	Bernat, 2021
	Cocaine CPP (after abstinence)	VP-LH	Chemogenetic inhibition (hM4Di)	↓ Expression	Reduces conditioned drug seeking	Bernat, 2021
	Cocaine CPP	NAcD1-VP	Optogenetic stimulation (ChR2)	↓ CPP acquisition	Reduced drug conditioned reward	Liu, 2022
	Sucrose PR during cocaine withdrawal	NAcD1-VP	Optogenetic LTD	↔ Break point	No effect	Creed, 2016
	Sucrose taste reactivity during cocaine withdrawal	NAcD1-VP	Optogenetic LTD	↔ Sucrose 'liking'	No effect
	Sucrose PR during cocaine withdrawal	NAcD2-VP	Optogenetic LTD	↑ Break point	Restoration of motivation after cocaine withdrawal	Creed, 2016
	Sucrose taste reactivity during cocaine withdrawal	NAcD2-VP	Optogenetic LTD	↑ Sucrose 'liking'	Restoration of pleasure after cocaine withdrawal
	Cocaine sensitization	NAcD1-VP	Optogenetic LTD	↓ Expression	Reduced behavioral sensitization	Creed, 2016
	Cocaine sensitization	NAcD2-VP	Optogenetic LTP	↔ Expression	No effect	Creed, 2016
	Amphetamine sensitization (context-conditioned)	dlVP-STN	Chemogenetic inhibition (hM4Di)	↓ Movement	Reduced conditioned drug effect	Nakata, 2022
	Amphetamine sensitization (drug-challenge)	dlVP-STN	Chemogenetic inhibition (hM4Di)	↔ Movement	No effect	Nakata, 2022
	Table 3: Anxiety, fear and depression
	Behavior	Cell/circuit	Manipulation	Effect	Summary	Citation
	Anxiety	VPGABA	Optogenetic excitation (ChR2)	↔ EPM open arm time, OF center time	No effect	Zhu, 2017
	Anxiety	VPGABA	Optogenetic excitation (ChR2)	↓ EPM open arm time	Anxiogenic	Roman-Ortiz, 2021
	Anxiety	VPGABA	Chemogenetic activation (hM3Dq)	↑ OF center time, ↑ LDB light entries, ↔ EPM open arm time	Anxiolytic	Li, 2021
	Anxiety	VPPV	Optogenetic excitation (ChR2)	↔ EPM open arm time, OF center time	No effect	Zhu, 2017
	Anxiety	VPNpas1	Chemogenetic activation (hM3Dq)	↓ OF center time	Anxiogenic	Morais-Silva, 2022
	Anxiety (Conflict)	NAcD1-VP	Optogenetic excitation (ChR2) at periphery OF	↑ OF center time (avoidance of periphery)	Anxiogenic	Liu 2022
	Inhibitory Avoidance	VPPenk	Chemogenetic activation (hM3Dq)	↓ Aversive memory acquisition	Reduced aversive memory	Macpherson, 2019
	Fear (Auditory)	VPGABA	Optogenetic excitation (ChR2)	↓ Aversive memory acquisition and expression	Reduced aversive memory	Roman-Ortiz, 2021
	Fear (Auditory)	VPGABA-PAG	Optogenetic excitation (ChR2)	↓ Aversive memory expression	Reduced aversive memory	Roman-Ortiz, 2021
	Behavioral despair (post-defeat)	VPPV	Genetic inhibition (Kir2.1 overexpression)	↓ Tail suspension test immobility	Anti-depressant	Knowland, 2017
	Behavioral despair (post-defeat)	VPPV-VTA	Chemogenetic inhibition (hM4Di)	↔ Tail suspension test immobility	No effect	Knowland, 2017
	Behavioral despair (post-defeat)	VPPV-lHb	Chemogenetic inhibition (hM4Di)	↓ Tail suspension test immobility	Anti-depressant	Knowland, 2017
	Behavioral despair (post-defeat)	VPGlu-lHb	Optogenetic inhibition (ArchT) during defeat	↓ Tail suspension test immobility	Anti-depressant	Liu, 2020
	Behavioral despair (post-defeat)	VPGlu-lHb	Optogenetic stimulation (ChR2) during defeat	↑ Tail suspension test immobility	Pro-depressant	Liu, 2020
	Social Interaction (post-defeat)	VPPV	Genetic inhibition (Kir2.1 overexpression)	↑ Social interaction	Anti-depressant	Knowland, 2017
	Social Interaction (post-defeat)	VPPV-VTA	Chemogenetic inhibition (hM4Di)	↑ Social interaction	Anti-depressant	Knowland, 2017
	Social Interaction (post-defeat)	VPPV-lHb	Chemogenetic inhibition (hM4Di)	↔ Social interaction	No effect	Knowland, 2017
	Social Interaction (post-defeat)	VPNpas1	Chemogenetic inhibition (hM4Di) during defeat	↑ Social interaction (promotes resilience against defeat)	Anti-depressant	Morais-Silva, 2022
	Social Interaction (post-defeat)	VPGlu-lHb	Optogenetic inhibition (ArchT) during defeat	↑ Social interaction (promotes resilience against defeat)	Anti-depressant	Liu, 2020
	Social Interaction (post-defeat)	VPNpas1	Chemogenetic activation (hM3Dq)	↓ Social interaction	Pro-depressant	Morais-Silva, 2022
	Social Interaction (post-defeat)	VPGlu-lHb	Optogenetic stimulation (ChR2) during defeat	↓ Social interaction	Pro-depressant	Liu, 2020
	Table 4: Movement
	Behavior	Cell/circuit	Manipulation	Effect	Summary	Citation
	Locomotion (OF)	VPGABA	Optogenetic inhibition (GtACR2)	↓ Velocity	Reduced movement	Yao, 2021
	Locomotion (OF)	VPGABA-VTA	Chemogenetic disconnection (hM4Di)	↔ Distance traveled	No effect	Prasad and McNally, 2019
	Locomotion (OF)	VPGABA-LH	Chemogenetic disconnection (hM4Di)	↔ Distance traveled	No effect	Prasad and McNally, 2019
	Locomotion (OF)	VPPV-VTA	Chemogenetic disconnection (hM4Di)	↔ Distance traveled	No effect	Prasad and McNally, 2019
	Locomotion (OF)	VPPV-LH	Chemogenetic disconnection (hM4Di)	↔ Distance traveled	No effect	Prasad and McNally, 2019
	Locomotion (OF)	VPGlu	Optogenetic inhibition (GtACR2)	↔ Velocity	No effect	Yao, 2021
	Locomotion (OF)	VP-NAshell	Optogenetic inhibition (Arch3.0)	↔ Distance traveled	No effect	Vachez, 2022
	Locomotion (OF)	VP-VTA	Chemogenetic disconnection (hM4Di)	↔ Distance traveled	No effect	Prasad and McNally, 2016
	Locomotion (OF)	VP-STN	Chemogenetic disconnection (hM4Di)	↔ Distance traveled	No effect	Prasad and McNally, 2016
	Locomotion (OF)	NAcore-dlVP	Optogenetic inhibition (ArchT)	↔ Distance traveled	No effect	Stefanik, 2013
	Locomotion (OF)	dmNAshellD2-VP	Optogenetic excitation (ChR2)	↔ Velocity	No effect	Yao, 2021
	Locomotion (OF)	vmNAshellD2-VP	Optogenetic excitation (ChR2)	↑ Velocity	Increased movement	Yao, 2021
	Locomotion (OF)	vlNAshellD2-VP	Optogenetic excitation (ChR2)	↓ Velocity	Reduced movement	Yao, 2021
	Locomotion (OF)	VPGABA	Optogenetic excitation (ChR2)	↔ Velocity	No effect	Yao, 2021
	Locomotion (OF)	VPGABA	Chemogenetic activation (hM3Dq)	↑ Distance traveled	Increased movement	Li, 2020
	Locomotion (OF)	VPGlu	Optogenetic excitation (ChR2)	↓ Velocity	Reduced movement	Yao, 2021
